# Supplementary material
Source: Springer Nature journal article supplement (https://www.springerprofessional.de/resource/supplementary/13677_2012_9_MOESM4_ESM.pdf/10743424)

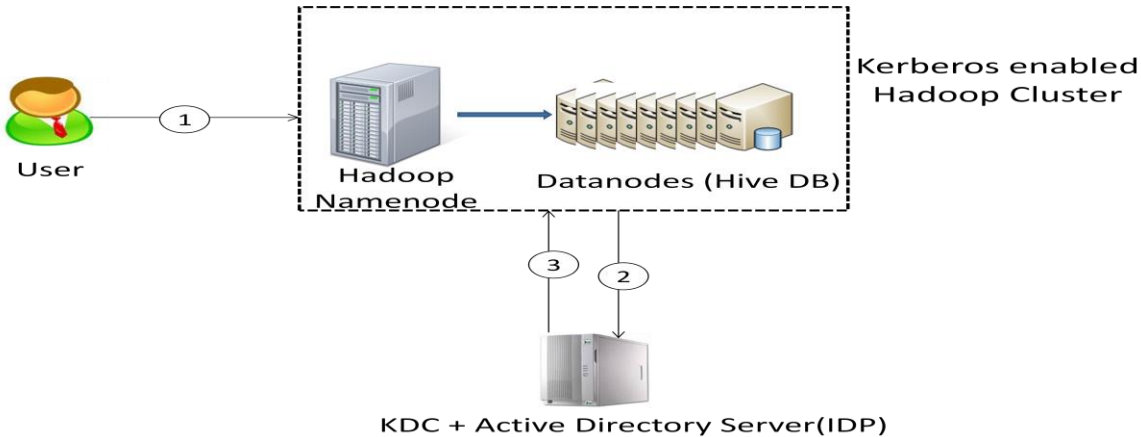

Supplement: MOESM4 [file 10743424]
